# Supplementary material
Source: PubMed Central journal article supplement (PMC3375944)
Supplement: supp_pp.112.195537_195537Fig_S1.pdf [file supp_pp.112.195537_195537Fig_S1.pdf]

## Supplemental Figure S1.

|       |      |               |      |
|-------|------|---------------|------|
| AHA2  | 587  | GDGVNDAPALKKA | 599  |
| MpHA1 | 118* | GDGVNDAPALKKA | 130* |
| MpHA2 | 594  | GDGVNDAPALKKA | 606  |
| MpHA3 | 593  | GDGVNDAPALKKA | 605  |
| MpHA4 | 587  | GDGVNDAPALKKA | 599  |
| MpHA5 | 99*  | GDGVNDAPALKKA | 111* |
| MpHA6 | 647  | GDGVNDAPALKKA | 659  |
| MpHA7 | 582  | GDGVNDAPALKKA | 594  |
| MpHA8 | 600  | GDGVNDAPALKKA | 612  |

**Supplemental Figure S1.** Alignment of conserved segments in the catalytic domain of H<sup>+</sup>-ATPase from *M. polymorpha* and *A. thaliana* with ClustalW (Thompson et al., 1994). Black blocks indicate highly conserved residues. Asterisks mean that the proteins were not full-length and N-terminal information was not acquired.
