# Supplementary material
Source: PubMed Central journal article supplement (PMC3375944)
Supplement: supp_pp.112.195537_195537Fig_S2.pdf [file supp_pp.112.195537_195537Fig_S2.pdf]

## Supplemental Figure S2.

|           |     |                                                                |     |
|-----------|-----|----------------------------------------------------------------|-----|
| GF14phi   | 1   | MAAPPASSSAREEFVYLAKLAEQAERYEMVEFMEKVAEAVDKDELTVVEERNLLSVAYKN   | 60  |
| Mp14-3-3a | 1   | MAAR---DEFREENVYMAKLAEQAERYDEMVEAMEKVAKTVDVVEELTVVEERNLLSVAYKN | 57  |
| GF14phi   | 61  | VIGARRASWRIISSIEQKEESRGNDHVTTRDYRSKTESELKICDGIKLLDTRLVPA       | 120 |
| Mp14-3-3a | 58  | VIGARRASWRIISSIEQKEESKGNDDHVAMIKDYRAKVESELSTICESILNLLDTHLIP    | 117 |
| GF14phi   | 121 | SANGDSKVFYLMKMGDYHRYLAEFKTCQERKDAEHTLTAYKAAQDIANAELAPTHPIRL    | 180 |
| Mp14-3-3a | 118 | STTGESKVFYLMKMGDYHRYLAEFKTCGERKDAEHTLTAYKSAQDIALTELAPTHPIRL    | 177 |
| GF14phi   | 181 | GLALNFSVIFYEILNSPDRACNLAKQAFDEATAELDTLGEESYKDSTLIMQLLRDNLTLW   | 240 |
| Mp14-3-3a | 178 | GLALNFSVIFYEILNSPDRACNLAKQAFDEATAELDTLGEESYKDSTLIMQLLRDNLTLW   | 237 |
| GF14phi   | 241 | TSDMQDESPEEIKKAAAPKPAEEQKEI                                    | 267 |
| Mp14-3-3a | 238 | TSDMQEDAGDDTKEAKT-EDAEDS---                                    | 260 |

**Supplemental Figure S2.** Alignment of 14-3-3 proteins from *M. polymorpha* (Mp14-3-3a) and *A. thaliana* (GF14phi) with ClustalW (Thompson et al., 1994). Black blocks indicate identical amino acid residues; dashes indicate gaps introduced to allow for optimal alignment of sequences.
