# Supplementary material
Source: PubMed Central journal article supplement (PMC3375944)
Supplement: supp_pp.112.195537_195537Fig_S3.pdf [file supp_pp.112.195537_195537Fig_S3.pdf]

## Supplemental Figure S3.

A

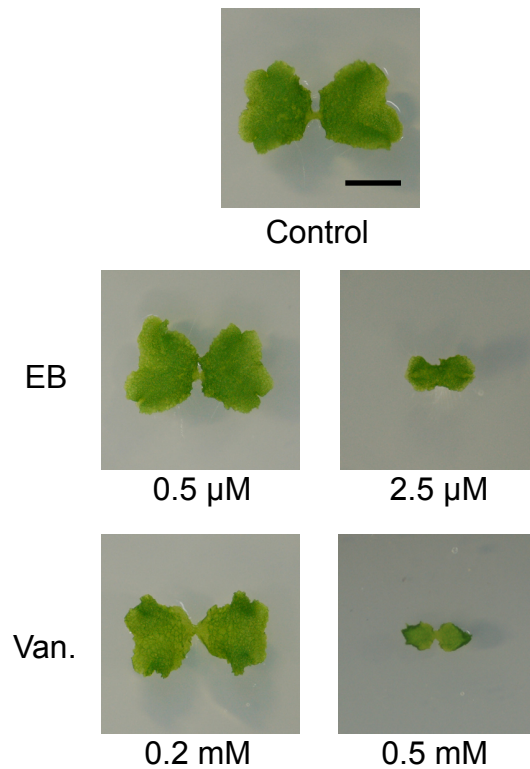

B

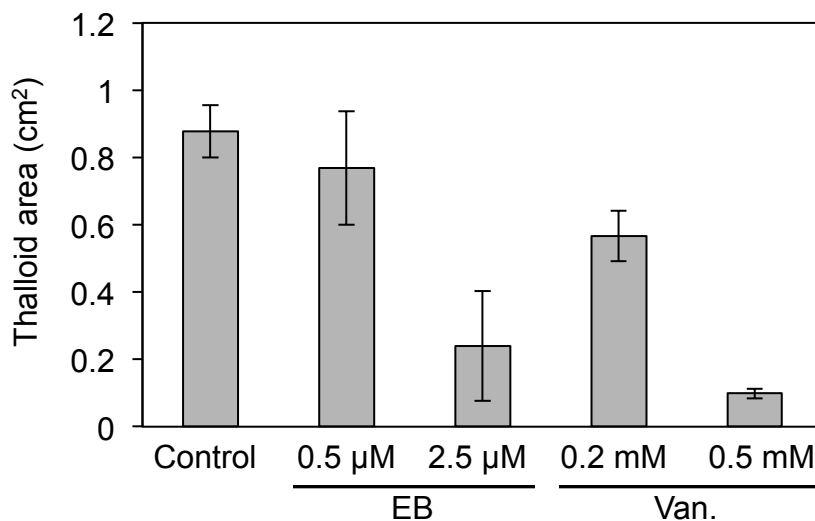

**Supplemental Figure S3.** Effects of H<sup>+</sup>-ATPase inhibitors on growth of the *M. polymorpha* thalli. Gemmae of *M. polymorpha* were grown on half-strength Gamborg's B5 medium in the absence (Control) or in the presence of erythrosin B (EB) or sodium orthovanadate (Van.) at the indicated concentrations. The thalloid area of 2-week-old thalli was measured using ImageJ software. A, Photographs of *M. polymorpha* thalli grown for 2 weeks. Bar = 5 mm. B, The thalloid area of *M. polymorpha* grown for 2 weeks. Values represent means of 14 to 15 thalli with SD.
