# Supplementary material
Source: PubMed Central journal article supplement (PMC3375944)
Supplement: supp_pp.112.195537_195537Fig_S4.pdf [file supp_pp.112.195537_195537Fig_S4.pdf]

## Supplemental Figure S4.

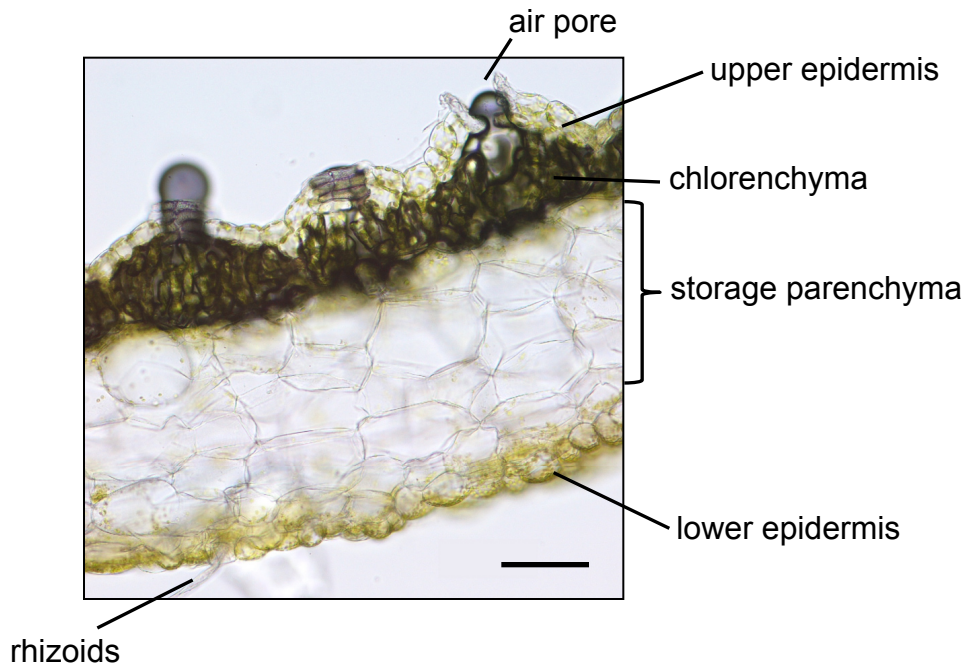

**Supplemental Figure S4.** Cross-section of *M. polymorpha* thallus. The thalli was grown under light of  $50 \mu\text{mol m}^{-2} \text{s}^{-1}$  for 3 weeks, and was sliced with a plant microtome MT-3 (NK system) into 150- $\mu\text{m}$  thick sections. Bar = 100  $\mu\text{m}$ .
