# Supplementary material
Source: PubMed Central journal article supplement (PMC3375944)
Supplement: supp_pp.112.195537_195537Table_S1.pdf [file supp_pp.112.195537_195537Table_S1.pdf]

**Supplemental Table S1.** Analysis of MpHAs based on amino acid sequences.

The first column shows the percentage of amino acid identity between the catalytic domain of MpHAs and AHA2. The second column shows deduced molecular masses of MpHAs. n.a., Not available. <sup>a</sup>Amino acid identity of MpHA1 and MpHA5 is incomplete because of a lack of sequencing information. <sup>b</sup>The H<sup>+</sup>-ATPase from *A. thaliana* (AHA2) has a deduced molecular mass of around 104.4 kD.

| Name               | Amino acid identity (%) | Deduced molecular mass <sup>b</sup> (kD) |
|--------------------|-------------------------|------------------------------------------|
| MpHA1 <sup>a</sup> | 85.6                    | n.a.                                     |
| MpHA2              | 83.0                    | 104.9                                    |
| MpHA3              | 80.6                    | 105.0                                    |
| MpHA4              | 80.6                    | 104.4                                    |
| MpHA5 <sup>a</sup> | 85.8                    | n.a.                                     |
| MpHA6              | 70.7                    | 120.0                                    |
| MpHA7              | 74.9                    | 95.9                                     |
| MpHA8              | 73.0                    | 95.6                                     |
